# Supplementary material for: Exploration of the impact of graphene oxide, acetylenic gemini, and CTAT on the photophysical and aggregation properties of dipolar coumarin 153
Source: Royal Society of Chemistry journal article supplement (doi:10.1039/d3cp05361j), 2024-01-01
Supplement: d3cp05361j1.pdf [file d3cp05361j1.pdf]

## Supplementary Section

### Exploration of the impact of graphene oxide, acetylenic Gemini, and CTAT on the photophysical and aggregation properties of dipolar coumarin-153

Raju Sardar, Sourav Das, Rajesh Banik, Sayani Bhunia and Soumen Ghosh\*

Centre for Surface Science, Physical Chemistry Section, Department of Chemistry,

Jadavpur University, Kolkata-700032

\*E-mail of the corresponding author: [gsoumen70@hotmail.com](mailto:gsoumen70@hotmail.com)

#### 1. Synthesis of graphene oxide using modified Hummer's method:

A temperature-controllable magnetic stirrer was used to continuously stir a mixture of 1 gm of graphite flakes and 0.5 gm of  $\text{NaNO}_3$  in a 250 mL round bottom flask while adding 25 mL of concentrated  $\text{H}_2\text{SO}_4$ . After two hours, the aforementioned solution was gradually supplemented with 3 g of  $\text{KMnO}_4$  while maintaining the temperature below  $25^\circ\text{C}$  in an ice bath to prevent overheating and explosion. While the  $\text{KMnO}_4$  was added, the mixture was continuously stirred. The addition of  $\text{KMnO}_4$  resulted in the appearance of a greenish hue (Figure S1 (A)). Following the addition of  $\text{KMnO}_4$ , the mixture was vigorously agitated at  $35^\circ\text{C}$  for a whole night. The resulting solution, which had taken on the appearance of a mass and was coloured brown, was then placed into a 500 mL water beaker while being vigorously mixed. The suspension was then treated with a 10% solution of 30%  $\text{H}_2\text{O}_2$  to guarantee that the reaction with the  $\text{KMnO}_4$  was completed. After adding  $\text{H}_2\text{O}_2$ , a pale-yellow glazy look (cf. Figure S1 (B)) emerged. The resulting combination was centrifuged and decanted of the supernatant liquid before the brown-black mass (Figure S1(C)) was taken and placed in a watch glass. The mixture was then washed with  $\text{HCl}$  and  $\text{H}_2\text{O}_2$ , respectively. Thus, graphene oxide sheets were produced after 4-5 days of drying at temperatures below  $50^\circ\text{C}$ . These sheets were broken up in a mortar before being sent through a molecular sieve. Finally, black GO powder was attained.

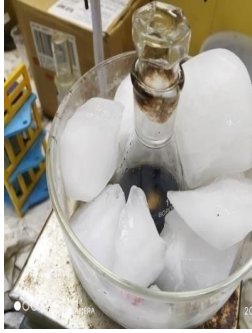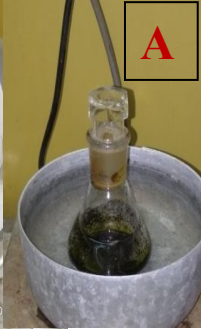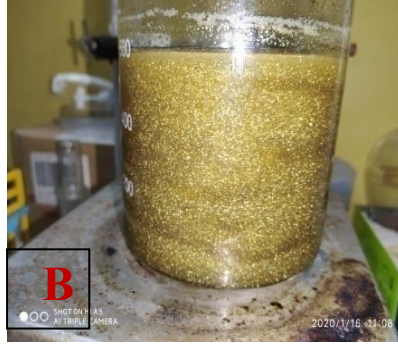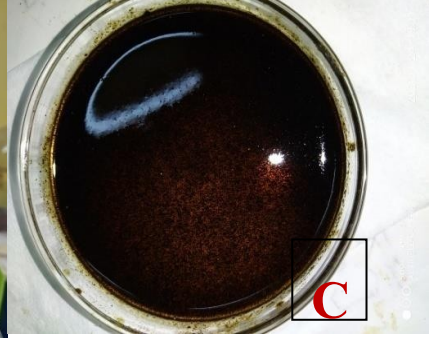

**Fig. S1: Synthetic steps of graphene oxide using modified Hummer's method.**

**2. Synthesis of N, N'- di hexadecyl - N, N, N', N'- tetramethyl-N, N'-but-2-ynediyl-di-ammonium chloride (16-4-16):**

Di cationic Gemini surfactant was prepared as per the protocol reported by Menger et. al. [40]. N, N-Dimethyl hexadecyl amine (0.5 gm, 3.2 mmol) was transferred into a 250 mL round-bottomed flask and dissolved in 20 mL dry acetone. After dissolution, 0.3 gm (1.4 mmol) 1,4- dichloro-2-butylene was added dropwise to the solution taken in the round-bottomed flask at room temperature with constant stirring. After complete addition, the resultant solution was stirred at room temperature overnight. White solids appeared after the first 2 hours of stirring. After overnight stirring, the obtained white solid was filtered, washed with acetone, dried under a vacuum, and recrystallized with hot acetone (Yield: 75%, m.p.- 215<sup>0</sup> C (dec.)).

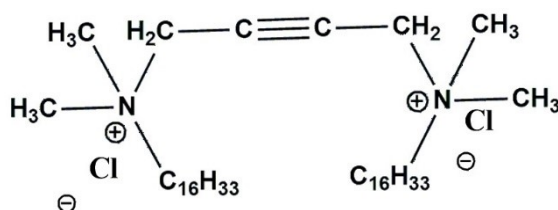

**Fig. S2: Structure of synthesized cationic Gemini surfactant (16-4(2-yen)-16) (16-4-16).**

**3. Characterisation of 16-4-16 surfactant:**

**<sup>1</sup>H NMR:**

<sup>1</sup>H NMR: (300MHz, CDCl<sub>3</sub>): δ5.17(s,4H), 3.63(t,4H), 3.43(s,12H), 1.75(m,4H), 1.34  
1.05(m,52H), 0.85 (t, 6H)

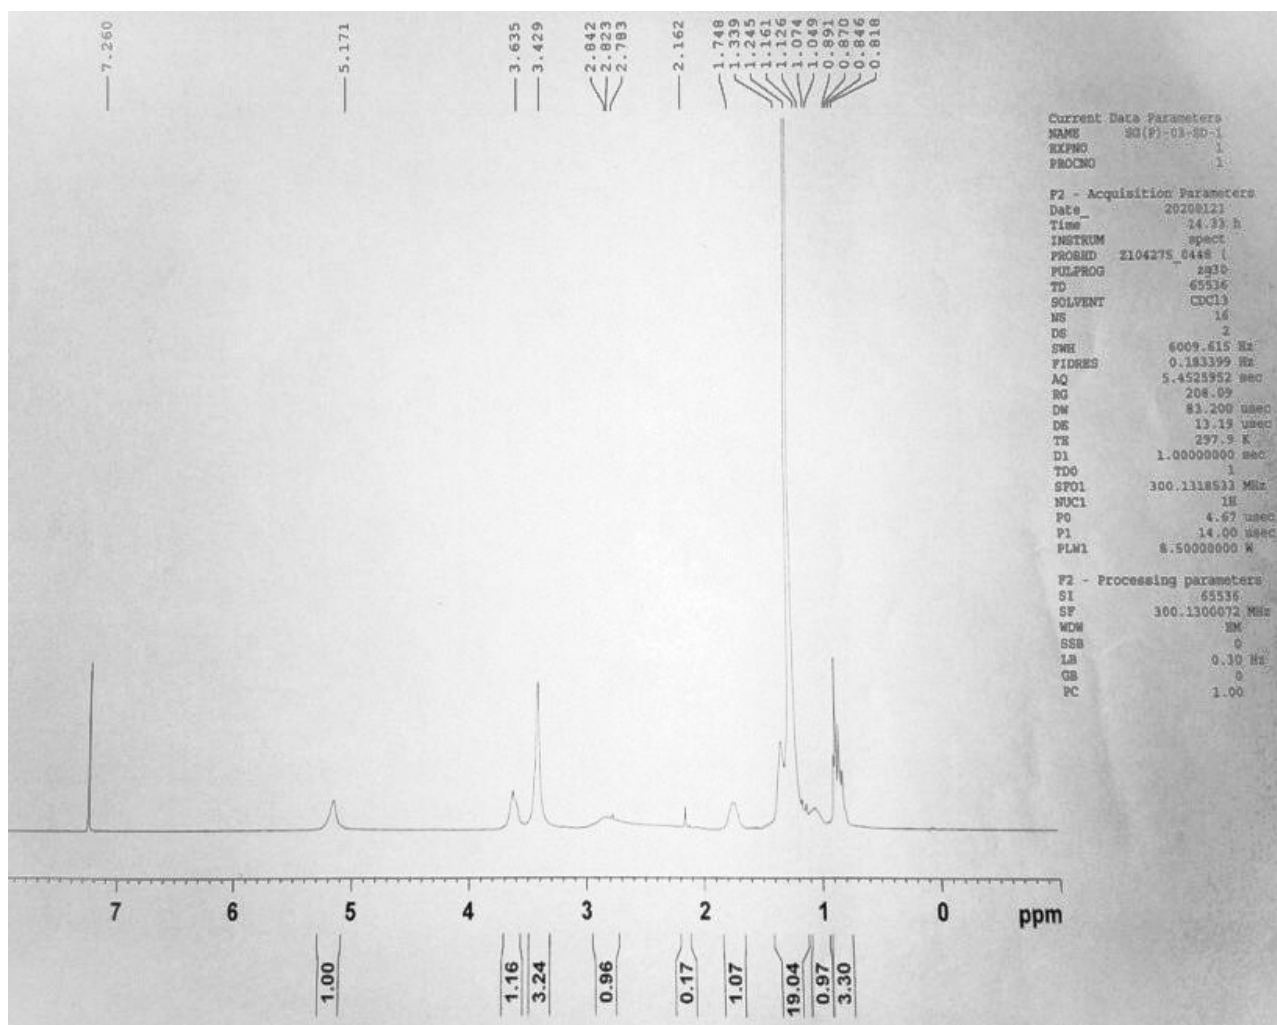

Fig. S3:  $^1\text{H}$  NMR of synthesised 16-4-16 gemini surfactant

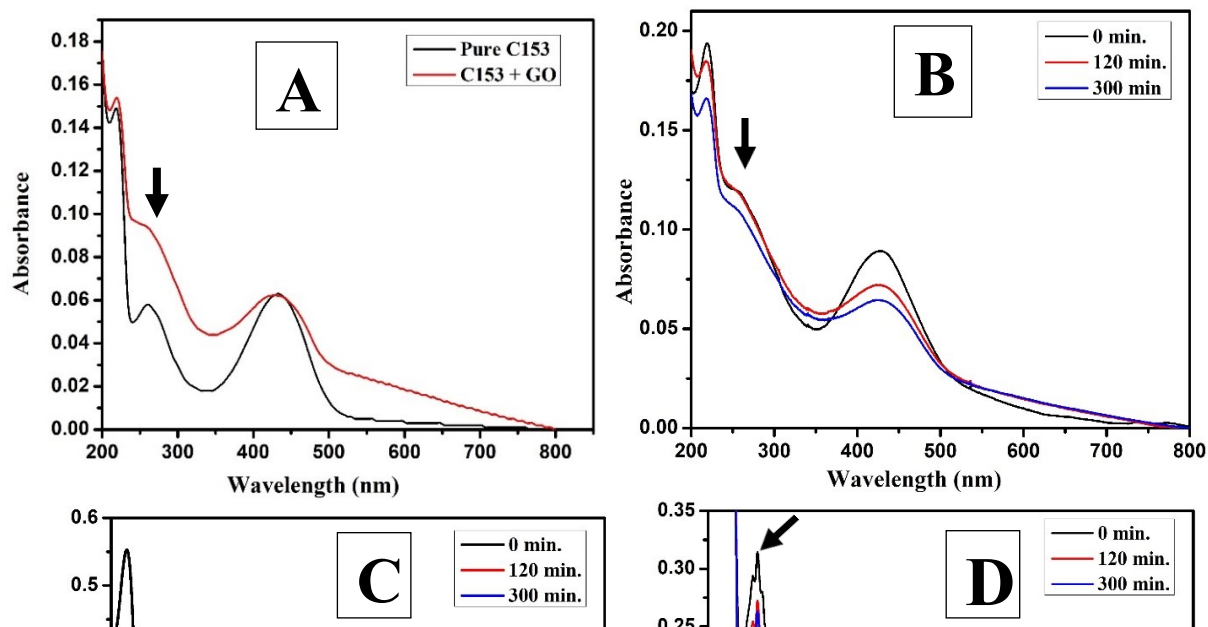

**Fig. S4: UV-Vis spectra of C153 & GO-C153 (A). The change in UV-Vis spectra of (B) GO-C153, (C) GO-C153-16-4-16, and (D) GO-C153-CTAT complexes overtime to study the change in surface plasmon (SPR) band of GO in the complexes. The SPR band is designated by solid arrow.**
